# Supplementary material for: An Integrative Approach to Selected Species of Tanacetum L. (Asteraceae): Insights into Morphology and Phytochemistry
Source: MDPI journal article supplement (doi:10.3390/plants13020155), 2024-01-05
Supplement: s1 [file s1]

**Table S1.** GC-MS profiles of the essential oils obtained from the flowered aerial parts of the selected *Tanacetum* species collected in June 2021. The individual compounds are grouped according to different chemical classes and the IUPAC names are reported. The common compounds to the three target species are indicated in grey color.

*Tv* = *T. vulgare*; *Tp* = *T. parthenium*; *Tc* = *T. corymbosum*.

| N.                                         | LRI <sup>a</sup> | LRI <sup>b</sup> | Compound                                      | IUPAC name                                                                                                        | Relative abundance (%) |           |           |
|--------------------------------------------|------------------|------------------|-----------------------------------------------|-------------------------------------------------------------------------------------------------------------------|------------------------|-----------|-----------|
|                                            |                  |                  |                                               |                                                                                                                   | <i>Tv</i>              | <i>Tp</i> | <i>Tc</i> |
| Non terpenic hydrocarbons and derivatives: |                  |                  |                                               |                                                                                                                   |                        |           |           |
| 1                                          | 769              | 776              | hexanal                                       | hexanal                                                                                                           | 0.59                   | 0.55      | 11.00     |
| 2                                          | 821              | 821              | 2-hexyn-1-ol                                  | 2-hexyn-1-ol                                                                                                      | -                      | 0.21      | -         |
| 3                                          | 843              | 835              | 2-hexenal                                     | 2-hexenal                                                                                                         | 0.25                   | 0.41      | 4.57      |
| 5                                          | 869              | 868              | 1,6-dimethylcyclohexene                       | 1,6-dimethylcyclohexene                                                                                           | 0.26                   | -         | -         |
| 7                                          | 922              | 926              | 2,5,5-trimethyl-1,3,6-heptatriene             | 2,5,5-trimethyl-1,3,6-heptatriene                                                                                 | 0.82                   | -         | -         |
| 4                                          | 863              | 854              | 1-hexanol                                     | 1-hexanol                                                                                                         | -                      | 0.27      | -         |
| 15                                         | 1037             | 1025             | <i>p</i> -cymene                              | 1-methyl-4-propan-2-ylbenzene                                                                                     | 3.37                   | -         | -         |
| 16                                         | 1062             | 1072             | hotrienol                                     | 3,7-Dimethyl-1,5,7-octatrien-3-ol                                                                                 | 2.51                   | -         | -         |
| 23                                         | 1103             | 1083             | nonanal                                       | nonanal                                                                                                           | 0.97                   | 0.15      | -         |
| 24                                         | 1106             | 1108             | 2,2,6-trimethyl-3-keto-6-vinyltetrahydropyran | 2,2,6-trimethyl-3-keto-6-vinyltetrahydropyran                                                                     | -                      | 0.61      | -         |
| 25                                         | 1107             | 1167             | 2-nonen-1-ol                                  | 2-nonen-1-ol                                                                                                      | 0.65                   | 0.72      | -         |
| 45                                         | 1307             | 1331             | silphiperfol-5-ene                            | (1 <i>S</i> ,5 <i>R</i> ,8 <i>R</i> ,9 <i>S</i> )-2,3,5,9-tetramethyltricyclo[6.3.0.0 <sup>1,5</sup> ]undec-3-ene | -                      | -         | 0.74      |
| Monoterpene hydrocarbons                   |                  |                  |                                               |                                                                                                                   |                        |           |           |
| 6                                          | 897              | 902              | santolina triene                              | 3-ethenyl-2,5-dimethylhexa-1,4-diene                                                                              | 2.48                   | -         | -         |
| 8                                          | 926              | 925              | 3-thujene                                     | 2-methyl-5-propan-2-ylbicyclo[3.1.0]hex-2-ene                                                                     | 0.36                   | -         | -         |
| 9                                          | 937              | 933              | $\alpha$ -pinene                              | 2,6,6-trimethylbicyclo[3.1.1]hept-2-ene                                                                           | 1.11                   | -         | -         |
| 10                                         | 955              | 946              | camphene                                      | 2,2-dimethyl-3-methylidenebicyclo[2.2.1]heptane                                                                   | 1.95                   | -         | -         |
| 11                                         | 981              | 973              | $\beta$ -pinene                               | 6,6-dimethyl-2-methylidenebicyclo[3.1.1]heptane                                                                   | 0.82                   | -         | -         |
| 17                                         | 1067             | 1060             | $\gamma$ -terpinene                           | 1-methyl-4-propan-2-ylcyclohexa-1,4-diene                                                                         | 0.29                   | 0.31      | -         |
| 18                                         | 1075             | 1070             | <i>cis</i> -sabinene hydrate                  | 2-methyl-5-propan-2-ylbicyclo[3.1.0]hexan-2-ol                                                                    | 2.38                   | 0.53      | -         |
| 20                                         | 1079             | 1079             | Terpinolene                                   | 1-methyl-4-propan-2-ylidenecyclohexene                                                                            | 0.18                   | -         | -         |
| 22                                         | 1091             | 1074             | <i>p</i> -cymenene                            | 1-methyl-4-propan-2-ylbenzene                                                                                     | -                      | -         | 1.54      |
| Oxygenated monoterpenes                    |                  |                  |                                               |                                                                                                                   |                        |           |           |
| Alcohols                                   |                  |                  |                                               |                                                                                                                   |                        |           |           |
| 13                                         | 1004             | 1000             | 2,5,5-trimethyl-3,6-heptadien-2-ol            | 2,5,5-trimethyl-3,6-heptadien-2-ol                                                                                | 0.43                   | -         | 0.47      |
| 19                                         | 1076             | 1072             | artemisia alcohol                             | 3,3,6-trimethylhepta-1,5-dien-4-ol                                                                                | -                      | -         | 0.66      |
| 21                                         | 1086             | 1086             | linalool                                      | 3,7-dimethylocta-1,6-dien-3-ol                                                                                    | 1.53                   | -         | -         |
| 26                                         | 1115             | 1207             | carveol                                       | 2-methyl-5-prop-1-en-2-ylcyclohex-2-en-1-ol                                                                       | 2.05                   | -         | -         |
| 27                                         | 1128             | 1105             | fenchol                                       | 1,3,3-trimethylbicyclo[2.2.1]heptan-2-ol                                                                          | 0.46                   | 0.27      | -         |
| 28                                         | 1132             | 1126             | <i>p</i> -menth-2-en-1-ol                     | 1-methyl-4-propan-2-ylcyclohex-2-en-1-ol                                                                          | 1.79                   | 0.33      | -         |
| 30                                         | 1170             | 1181             | myrtenol                                      | (6,6-dimethyl-2-bicyclo[3.1.1]hept-2-enyl)methanol                                                                | 0.97                   | -         | -         |

|                                     |      |      |                                                          |                                                                                                           |      |       |       |
|-------------------------------------|------|------|----------------------------------------------------------|-----------------------------------------------------------------------------------------------------------|------|-------|-------|
| 32                                  | 1150 | 1180 | isopinocarveol                                           | 6,6-dimethyl-2-methylidenebicyclo[3.1.1]heptan-3-ol                                                       | -    | 0.93  | 0.30  |
| 33                                  | 1182 | 1167 | endo-borneol                                             | 1,7,7-trimethylbicyclo[2.2.1]heptan-2-ol                                                                  | 2.23 | 1.11  | -     |
| 34                                  | 1189 | 1182 | terpinen-4-ol                                            | 4-methyl-1-propan-2-ylcyclohex-3-en-1-ol                                                                  | 0.66 | 0.78  | -     |
| 37                                  | 1233 | 1237 | cis-geraniol                                             | (2E)-3,7-dimethylocta-2,6-dien-1-ol                                                                       | -    | 0.90  | -     |
| <b>Epoxides</b>                     |      |      |                                                          |                                                                                                           |      |       |       |
| 12                                  | 991  | 1017 | myroxide                                                 | 2,2-Dimethyl-3-(3-methylpenta-2,4-dien-1-yl)oxirane                                                       | 1.57 | -     | -     |
| <b>Ethers</b>                       |      |      |                                                          |                                                                                                           |      |       |       |
| 14                                  | 1037 | 1022 | 1,8-cineole                                              | 1,3,3-trimethyl-2-oxabicyclo[2.2.2]octane                                                                 | 1.35 | 0.13  | 1.49  |
| 41                                  | 1274 | 1250 | geranyl vinyl ether                                      | (2E)-1-ethenoxy-3,7-dimethylocta-2,6-diene                                                                | 0.32 | -     | -     |
| <b>Aldehydes and Ketons</b>         |      |      |                                                          |                                                                                                           |      |       |       |
| 29                                  | 1156 | 1146 | camphor                                                  | 1,7,7-trimethylbicyclo[2.2.1]heptan-2-one                                                                 | 1.80 | 56.83 | 49.36 |
| 31                                  | 1146 | 1164 | $\alpha$ -pinocarvone                                    | 6,6-dimethyl-2-methylidenebicyclo[3.1.1]heptan-3-one                                                      | -    | 0.22  | -     |
| 35                                  | 1205 | 1171 | myrtenal                                                 | 6,6-dimethylbicyclo[3.1.1]hept-2-ene-2-carbaldehyde                                                       | 1.92 | -     | -     |
| 40                                  | 1265 | 1261 | 6-isopropyl-3-methyl-7-oxabicyclo[4.1.0]-heptan-2-one    | 6-isopropyl-3-methyl-7-oxabicyclo[4.1.0]-heptan-2-one                                                     | 1.05 | -     | 1.20  |
| 42                                  | 1281 | 1272 | <i>p</i> -mentha-1,8-dien-3-one]                         | (6S)-3-methyl-6-prop-1-en-2-ylcyclohex-2-en-1-one                                                         | 0.12 | -     | -     |
| <b>Esters</b>                       |      |      |                                                          |                                                                                                           |      |       |       |
| 38                                  | 1238 | 1305 | myrtenyl acetate                                         | (6,6-dimethyl-2-bicyclo[3.1.1]hept-2-enyl)methyl acetate                                                  | 1.81 | -     | -     |
| 39                                  | 1246 | 1260 | lyratyl acetate                                          | [(2E)-4-ethenyl-2,5-dimethylhexa-2,5-dienyl] acetate                                                      | 0.30 | -     | -     |
| 43                                  | 1288 | 1285 | bornyl acetate                                           | (1,7,7-trimethyl-2-bicyclo[2.2.1]heptanyl) acetate                                                        | 1.28 | -     | -     |
| 46                                  | 1319 | 1350 | $\alpha$ -terpinyl acetate                               | 2-(4-methylcyclohex-3-en-1-yl)propan-2-yl acetate                                                         | 0.27 | -     | -     |
| <b>Other oxygenated derivatives</b> |      |      |                                                          |                                                                                                           |      |       |       |
| 36                                  | 1215 | 1192 | (Z)-piperitol                                            | 4-[(3S,3aR,6S,6aR)-3-(1,3-benzodioxol-5-yl)-1,3,3a,4,6,6a-hexahydrofuro[3,4-c]furan-6-yl]-2-methoxyphenol | 0.18 | -     | -     |
| 44                                  | 1289 | 1287 | safrole                                                  | 5-prop-2-enyl-1,3-benzodioxole                                                                            | -    | 0.25  | -     |
| <b>Sesquiterpene hydrocarbons</b>   |      |      |                                                          |                                                                                                           |      |       |       |
| 47                                  | 1353 | 1398 | $\beta$ -elemene                                         | (1S,2S,4R)- 1-ethenyl-1-methyl-2,4-bis(prop-1-en-2-yl)cyclohexane                                         | 1.06 | -     | -     |
| 48                                  | 1363 | 1399 | cyperene                                                 | 4,10,11,11-tetramethyltricyclo[5.3.1.0 <sup>1,5</sup> ]undec-4-ene                                        | 3.22 | -     | -     |
| 49                                  | 1378 | 1376 | $\alpha$ -copaene                                        | 1,3-dimethyl-8-propan-2-yltricyclo[4.4.0.0 <sup>2,7</sup> ]dec-3-ene                                      | 0.22 | -     | -     |
| 50                                  | 1392 | 1398 | ciclohexane, 1-ethenyl-1-methyl-2,4-bis(1-methylethenyl) | ciclohexane, 1-ethenyl-1-methyl-2,4-bis(1-methylethenyl)                                                  | 2.13 | -     | -     |

|    |      |      |                           |                                                                          |      |      |      |
|----|------|------|---------------------------|--------------------------------------------------------------------------|------|------|------|
| 51 | 1426 | 1419 | caryophyllene             | 4,11,11-trimethyl-8-methylidenebicyclo[7.2.0]undec-4-ene                 | 1.99 | -    | -    |
| 52 | 1462 | 1496 | cis- $\alpha$ -bisabolene | 1-methyl-4-[(2Z)-6-methylhepta-2,5-dien-2-yl]cyclohexene                 | 0.53 | -    | -    |
| 54 | 1482 | 1483 | $\alpha$ -curcumene       | 1-methyl-4-(6-methylhept-5-en-2-yl)benzene                               | 0.95 | -    | -    |
| 56 | 1502 | 1405 | longifolene               | 3,3,7-trimethyl-8-methylidenetricyclo[5.4.0.0 <sup>2,9</sup> ]undecane   | 0.55 | -    | -    |
| 57 | 1516 | 1433 | $\gamma$ -elemene         | (1S,2R,4R)-1-ethenyl-1-methyl-2,4-bis(prop-1-en-2-yl)cyclohexane         | 0.61 | -    | 0.79 |
| 58 | 1523 | 1524 | $\delta$ -cadinene        | (1R,8aS)-4,7-dimethyl-1-propan-2-yl-1,2,3,5,6,8a-hexahydronaphthalene    | 0.63 | -    | -    |
| 59 | 1539 | 1532 | cubenene                  | (1S,4R,4aS)-1,6-dimethyl-4-propan-2-yl-1,2,3,4,4a,7-hexahydronaphthalene | 0.11 | -    | -    |
| 61 | 1549 | 1542 | $\alpha$ -calacorene      | (1S)-4,7-dimethyl-1-propan-2-yl-1,2-dihydronaphthalene                   | 4.92 | 0.27 | -    |

### Oxygenated sesquiterpenes

#### Alcohols

|    |      |      |                                             |                                                                                                          |      |       |      |
|----|------|------|---------------------------------------------|----------------------------------------------------------------------------------------------------------|------|-------|------|
| 60 | 1546 | 1576 | spathulenol                                 | (1aR,4aR,7S,7aR,7bR)-1,1,7-trimethyl-4-methylidene-1a,2,3,4a,5,6,7a,7b-octahydrocyclopropa[h]azulen-7-ol | 0.45 | -     | -    |
| 64 | 1579 | 1586 | ledol                                       | (1aR,4R,4aS,7R,7aS,7bS)-1,1,4,7-tetramethyl-2,3,4a,5,6,7,7a,7b-octahydro-1aH-cyclopropa[e]azulen-4-ol    | 2.05 | -     | -    |
| 67 | 1642 | 1637 | caryophylladienol                           | (5R)-10,10-dimethyl-2,6-dimethylidenebicyclo[7.2.0]undecan-5-ol                                          | 5.92 | 2.19  | -    |
| 68 | 1654 | 1638 | isospathulenol                              | 1,1,4,7-tetramethyl-2,3,5,6,7a,7b-hexahydro-1aH-cyclopropa[h]azulen-7-ol                                 | 0.86 | -     | -    |
| 70 | 1672 | 1681 | $\alpha$ -santalol                          | (Z)-5-[(1R,3R,6S)-2,3-dimethyl-3-tricyclo[2.2.1.0 <sup>2,6</sup> ]heptanyl]-2-methylpent-2-en-1-ol       | 0.79 | 0.98  | 0.50 |
| 71 | 1688 | 1694 | $\beta$ -santalol                           | (Z)-2-methyl-5-[(1S,2R,4R)-2-methyl-3-methylidene-2-bicyclo[2.2.1]heptanyl]pent-2-en-1-ol                | 1.36 | -     | -    |
| 74 | 1757 | 1713 | farnesol                                    | 3,7,11-trimethyldodeca-2,6,10-trien-1-ol                                                                 | 5.92 | 28.83 | -    |
| 75 | 1783 | 1778 | costol                                      | 2-(4a-methyl-8-methylidene-1,2,3,4,5,6,7,8a-octahydronaphthalen-2-yl)prop-2-en-1-ol                      | 1.15 | 0.58  | 0.80 |
| 76 | 1788 | 1701 | shyobunol                                   | 3-ethenyl-3-methyl-6-propan-2-yl-2-prop-1-en-2-ylcyclohexan-1-ol                                         | -    | -     | 1.92 |
| 78 | 1795 | 1695 | 7-isopropyl-4,10-dimethylenecyclodec-5-enol | 7-isopropyl-4,10-dimethylenecyclodec-5-enol                                                              | 1.39 | -     | -    |
| 79 | 1822 | 1763 | cis-lanceol                                 | (2E)-2-methyl-6-(4-methylcyclohex-3-en-1-yl)hepta-2,6-dien-1-ol                                          | 0.36 | 0.43  | -    |
| 80 | 1838 | 1777 | 15-hydroxy- $\alpha$ -muurolene             | 2-[(1R)-4,7-dimethyl-1,2,4a,5,6,8a-hexahydronaphthalen-1-yl]propan-1-ol                                  | 0.34 | -     | -    |

#### Aldehydes and Ketons

|    |      |      |                            |                                                                  |      |   |   |
|----|------|------|----------------------------|------------------------------------------------------------------|------|---|---|
| 55 | 1496 | 1499 | eremophilia-1(10),11-diene | 8,8a-dimethyl-1,3,4,6,7,8-hexahydronaphthalen-2-ylidene]propanal | 1.62 | - | - |
|----|------|------|----------------------------|------------------------------------------------------------------|------|---|---|

|                                   |      |      |                                    |                                                                                         |              |               |               |
|-----------------------------------|------|------|------------------------------------|-----------------------------------------------------------------------------------------|--------------|---------------|---------------|
| 65                                | 1595 | 1632 | Longiverbenone                     | 2,6,6,11-tetramethyltricyclo[5.4.0.0 <sup>2,8</sup> ]undec-10-en-9-one                  | 2.00         | 0.44          | -             |
| 72                                | 1707 | 1693 | germacra-3,7(11),9-trien-6-one     | (3E,7E)-3,7-dimethyl-10-propan-2-ylidenecyclodeca-3,7-dien-1-one                        | 0.44         | -             | -             |
| 77                                | 1790 | 1724 | thujopsenal                        | 4a,8,8-Trimethyl-1,1a,4,4a,5,6,7,8-octahydro-cyclopropa[d]naphthalene-2-carbaldehyde    | -            | -             | 2.23          |
| 81                                | 1853 | 1844 | hexahydrofarnesyl acetone          | 6,10,14-trimethylpentadecan-2-one                                                       | 1.89         | -             | -             |
| 82                                | 1869 | 1867 | $\alpha$ -santalone                | (E)-6-(2,3-dimethyltricyclo[2.2.1.0 <sup>2,6</sup> ]heptan-3-yl)-3-methylhex-3-en-2-one | -            | -             | 21.58         |
| <b>Esters</b>                     |      |      |                                    |                                                                                         |              |               |               |
| 53                                | 1470 | 1510 | <i>trans</i> -verbenyl isovalerate | 4,6,6-Trimethyl-bicyclo[3.1.1]hept-3-en-2-yl 3-methylbutanoate                          | -            | -             | 0.84          |
| <b>Epoxides</b>                   |      |      |                                    |                                                                                         |              |               |               |
| 62                                | 1551 | 1581 | caryophyllene oxide                | 4,12,12-trimethyl-9-methylidene-5-oxatricyclo[8.2.0.0 <sup>4,6</sup> ]dodecane          | -            | -             | -             |
| 63                                | 1570 | 1572 | 8-acetoxycarvo-tanacetone          |                                                                                         | 2.08         | -             | -             |
| 66                                | 1622 | 1606 | humulene epoxide                   | (4E,7E)-1,5,9,9-tetramethyl-12-oxabicyclo[9.1.0]dodeca-4,7-diene                        | 0.29         | -             | -             |
| 69                                | 1665 | 1672 | aromadendrene oxide (I)            | 1,1,7-trimethylspiro[2,3,4a,5,6,7,7a,7b-octahydro-1aH-cyclopropa[e]azulene-4,2'-oxirane | 1.30         | -             | -             |
| 73                                | 1716 | 1678 | aromadendrene oxide (II)           | 1,1,7-trimethylspiro[2,3,4a,5,6,7,7a,7b-octahydro-1aH-cyclopropa[e]azulene-4,2'-oxirane | 1.43         | -             | -             |
| <b>Oil Yields (%)</b>             |      |      |                                    |                                                                                         | <b>0.35</b>  | <b>0.09</b>   | <b>0.05</b>   |
| <b>Total Identified</b>           |      |      |                                    |                                                                                         | <b>89.67</b> | <b>100.00</b> | <b>100.00</b> |
| <b>Non-terpenic derivatives</b>   |      |      |                                    |                                                                                         | <b>9.42</b>  | <b>3.18</b>   | <b>16.32</b>  |
| <b>Monoterpene hydrocarbons</b>   |      |      |                                    |                                                                                         | <b>10.02</b> | <b>1.32</b>   | <b>2.01</b>   |
| <b>Oxygenated monoterpenes</b>    |      |      |                                    |                                                                                         | <b>21.64</b> | <b>61.51</b>  | <b>53.01</b>  |
| <b>Sesquiterpene hydrocarbons</b> |      |      |                                    |                                                                                         | <b>18.44</b> | <b>0.27</b>   | <b>0.79</b>   |
| <b>Oxygenated sesquiterpenes</b>  |      |      |                                    |                                                                                         | <b>30.15</b> | <b>33.72</b>  | <b>27.88</b>  |

The main common compounds are highlighted in grey colour.

LRI<sup>a</sup> = Linear Retention Index, experimentally obtained on a VF-5MS column using a C<sub>7</sub>-C<sub>30</sub> mixture of *n*-alkanes.

LRI<sup>b</sup> = Linear Retention Index as reported in NIST databases.
